# Supplementary material for: Metal ion induced fluorescence resonance energy transfer between crown ether functionalized quantum dots and rhodamine B: selectivity of K+ ion
Source: Royal Society of Chemistry journal article supplement (doi:10.1039/c4ra10925b), 2014-12-10
Supplement: c4ra10925b1.pdf [file c4ra10925b1.pdf]

Electronic Supporting Information

**Metal ion Induced Fluorescence Resonance Energy Transfer  
between Crown Ether Functionalized Quantum dots and  
Rhodamine B: Selectivity of K<sup>+</sup> ion**

Hsin-Lung Lee,<sup>a</sup> Namasivayam Dhenadhayalan<sup>a</sup> and King-Chuen Lin\*

Department of Chemistry, National Taiwan University, Taipei 106, and  
Institute of Atomic and Molecular Sciences, Academia Sinica, Taipei 106, Taiwan.

Email: [kclin@ntu.edu.tw](mailto:kclin@ntu.edu.tw)

Fax: +886-2-2362-1483; Tel: +886-2-3366-1162.

**Contents**

|                                                                                                                                                                                                                                               |    |
|-----------------------------------------------------------------------------------------------------------------------------------------------------------------------------------------------------------------------------------------------|----|
| <b>Fig. S1</b> <sup>1</sup> H NMR (a) and <sup>13</sup> C NMR (b) of Boc-6-Ahx-15-Crown-5                                                                                                                                                     | S2 |
| <b>Fig. S2</b> <sup>1</sup> H NMR (a), <sup>13</sup> C NMR (b) and ESI-MS (c) of RBCE                                                                                                                                                         | S3 |
| <b>Fig. S3</b> <sup>1</sup> H NMR (a), <sup>13</sup> C NMR (b) and ESI-MS (c) of 15-crown-5-DHLA                                                                                                                                              | S4 |
| <b>Fig. S4</b> TEM image of CdSe/ZnS capped 15-crown-5                                                                                                                                                                                        | S5 |
| <b>Fig. S5</b> FTIR spectra of (A) CdSe/ZnS capped octadecylamine and<br>(B) CdSe/ZnS capped 15-crown-5                                                                                                                                       | S5 |
| <b>Fig. S6</b> Fluorescence spectra of (a) QDCE and (b) RBCE with different<br>concentration of K <sup>+</sup> ion (0 to 2.5×10 <sup>-3</sup> M) in pH 8.3 buffer                                                                             | S6 |
| <b>Fig. S7</b> Fluorescence spectra of QDCE-RBCE conjugate with different<br>concentration of (a) Mg <sup>2+</sup> , (b) Na <sup>+</sup> , (c) Li <sup>+</sup> and (d) Ba <sup>2+</sup> ion<br>(0 to 2.5×10 <sup>-3</sup> M) in pH 8.3 buffer | S7 |
| <b>Fig. S8</b> Benesi-Hildebrand plot of 1/F-F <sub>0</sub> versus 1/[K <sup>+</sup> ] for the<br>QDCE-RBCE conjugate                                                                                                                         | S8 |



**Fig. S1**  $^1\text{H}$  NMR (a) and  $^{13}\text{C}$  NMR (b) of Boc-6-Ahx-15-Crown-5.

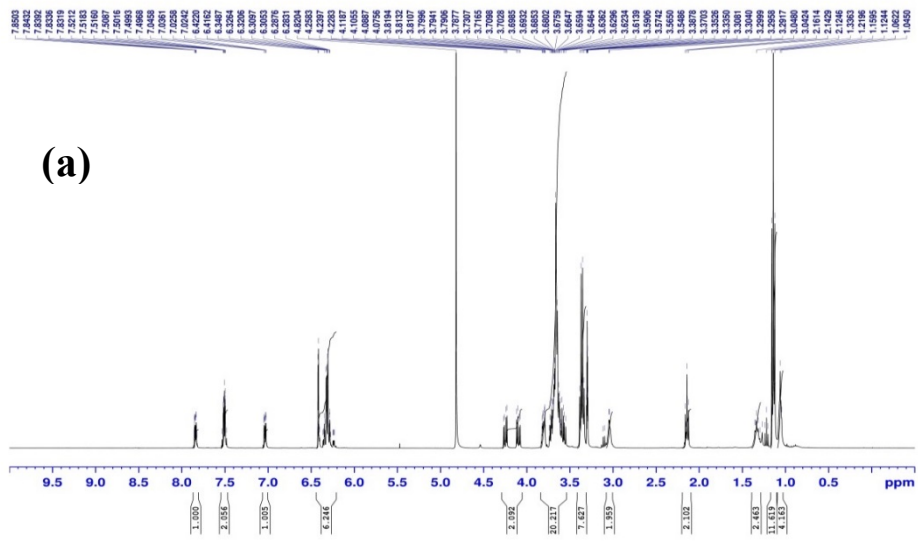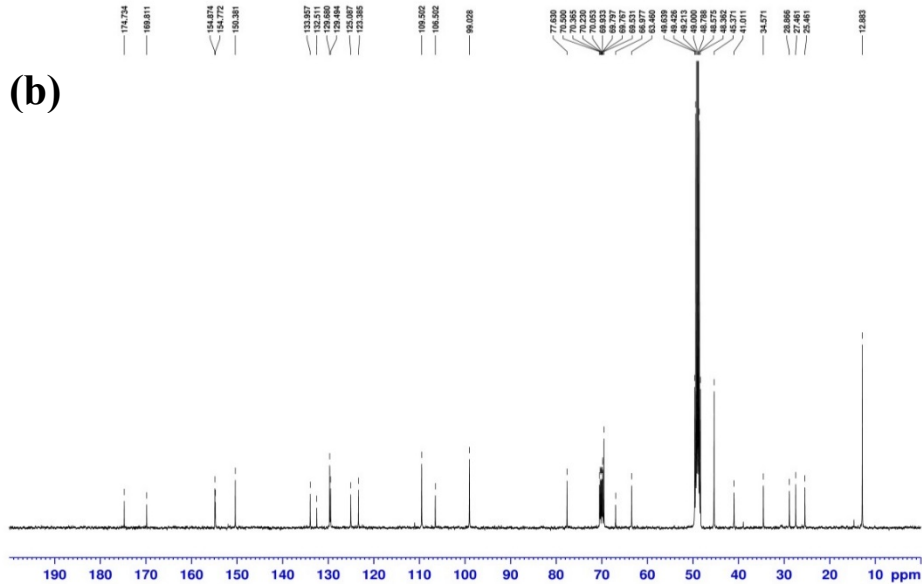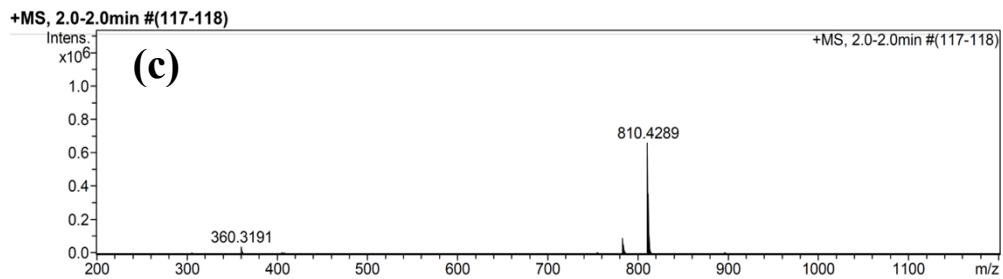

**Fig.**  
S2  
<sup>1</sup>H

NMR (a), <sup>13</sup>C NMR (b) and ESI-MS (c) of RBCE.

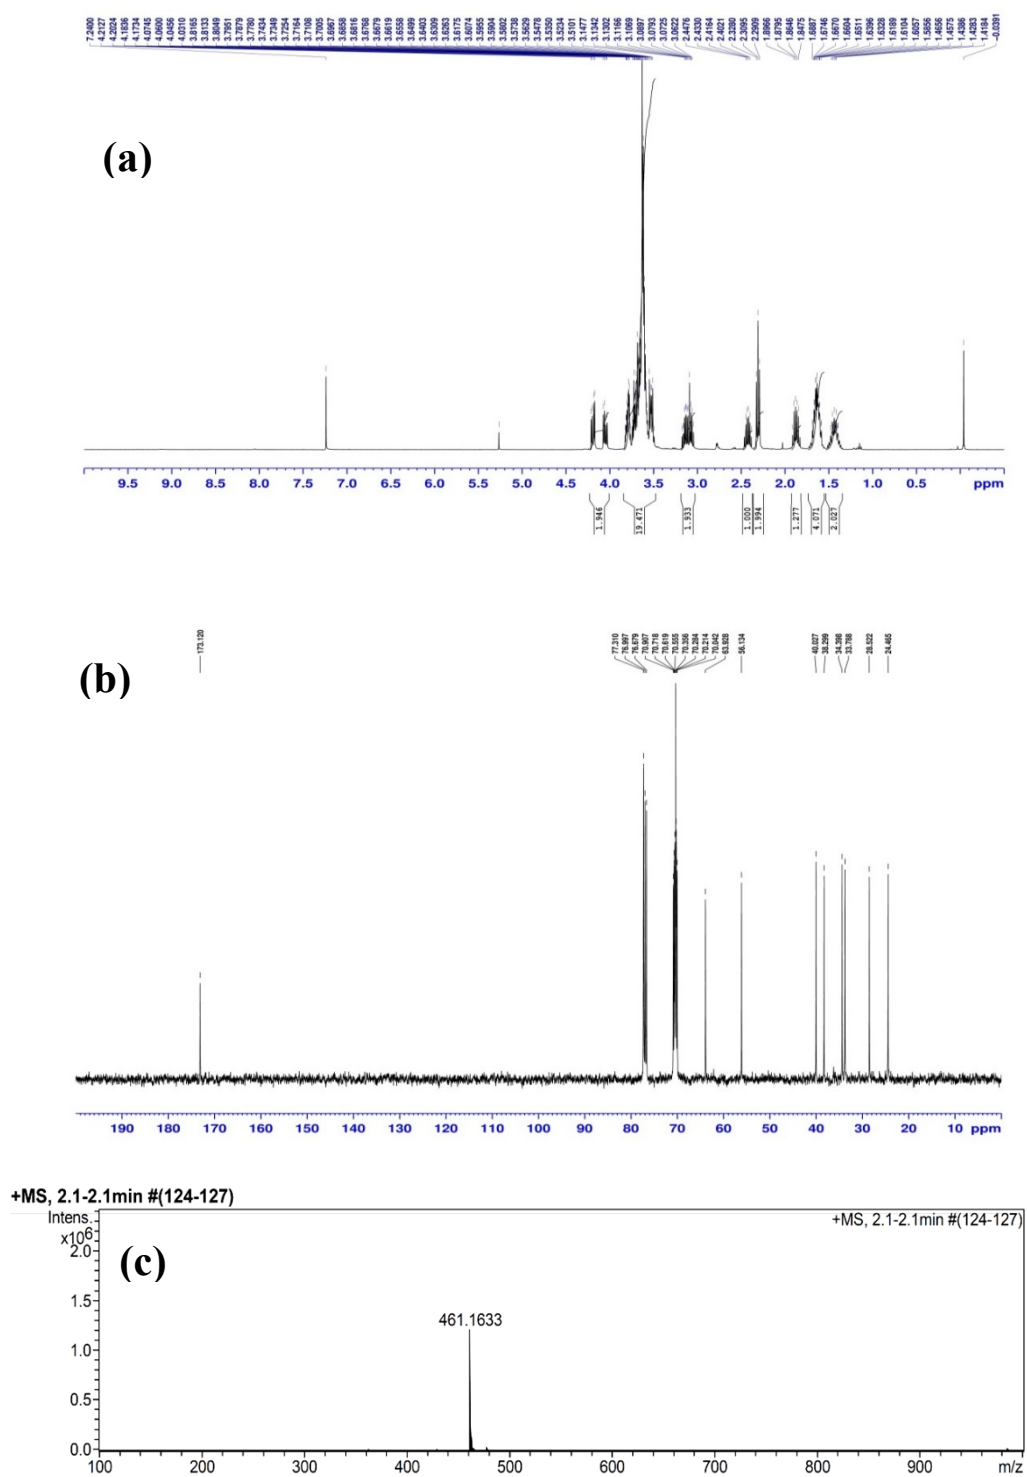

Fig.

**S3**  $^1\text{H}$  NMR (a),  $^{13}\text{C}$  NMR (b) and ESI-MS (c) of 15-crown-5-DHLA.

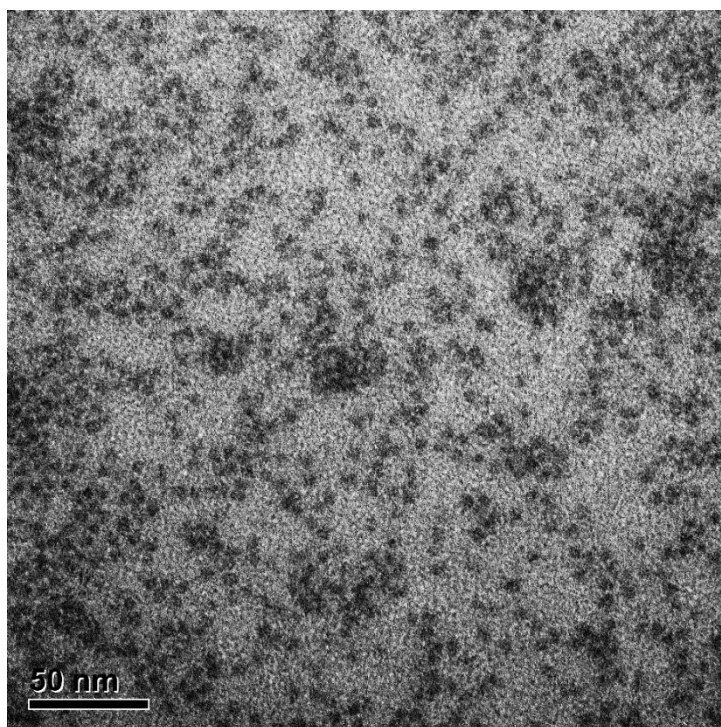

**Fig. S4** TEM image of CdSe/ZnS capped 15-crown-5.

**Fig. S5** FTIR spectra of (A) CdSe/ZnS capped octadecylamine and (B) CdSe/ZnS capped 15-crown-5.

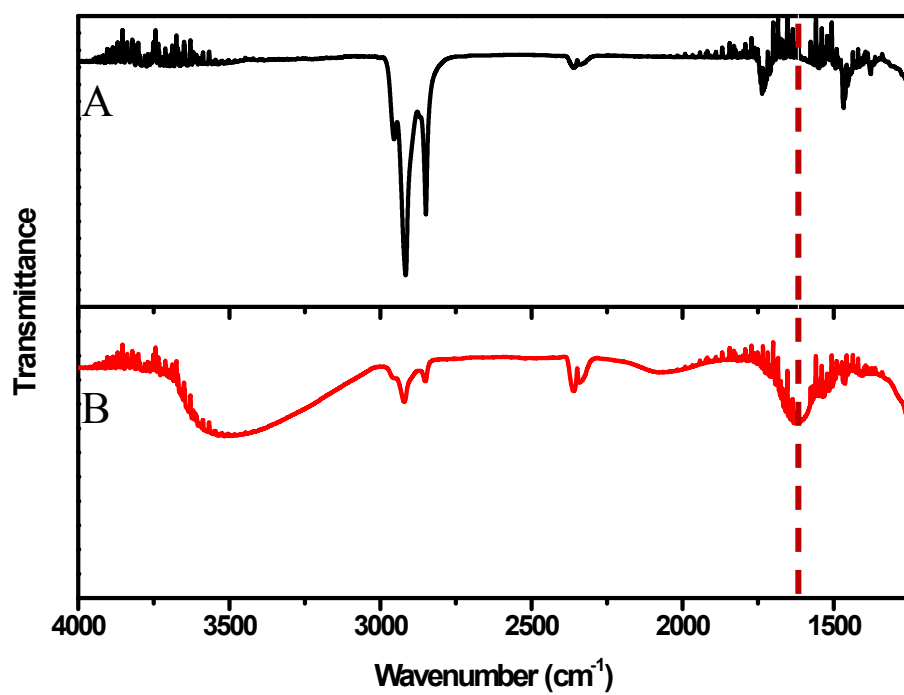

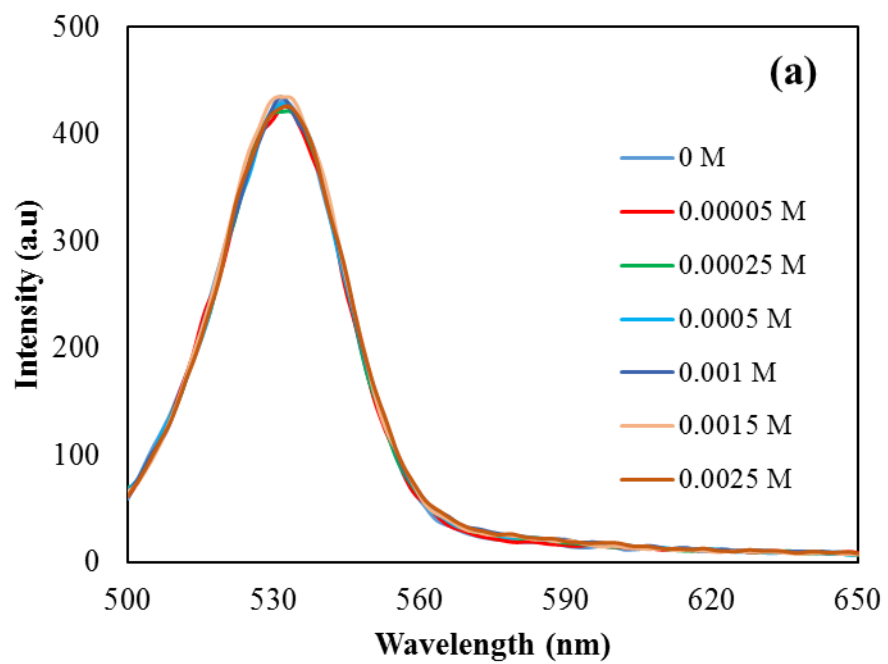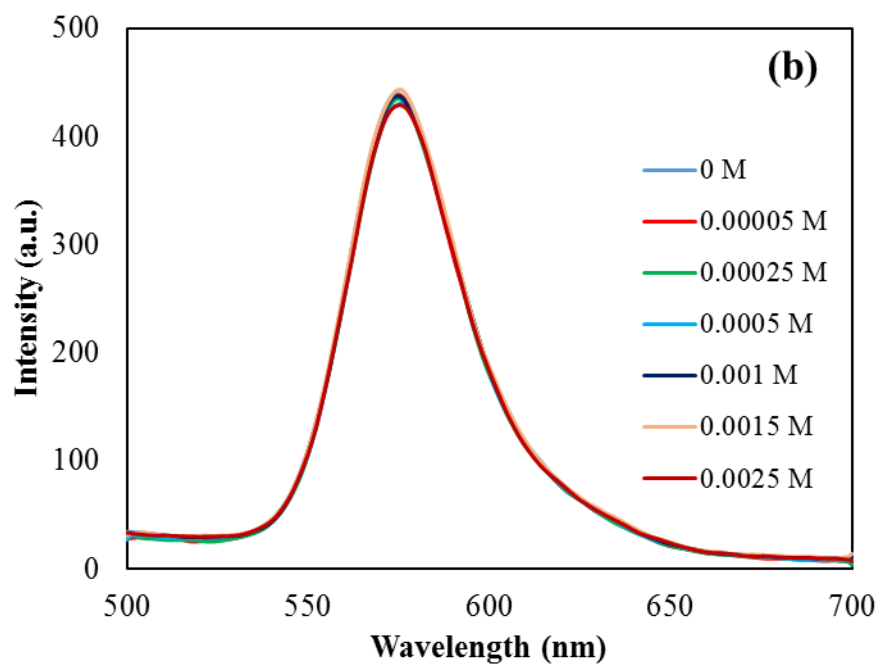

Fig.  
S6



Fluorescence spectra of (a) QDCE and (b) RBCE with different concentration of  $K^+$  ion (0 to  $2.5 \times 10^{-3}$  M) in pH 8.3 buffer.  $\lambda_{ex} = 375$  nm.

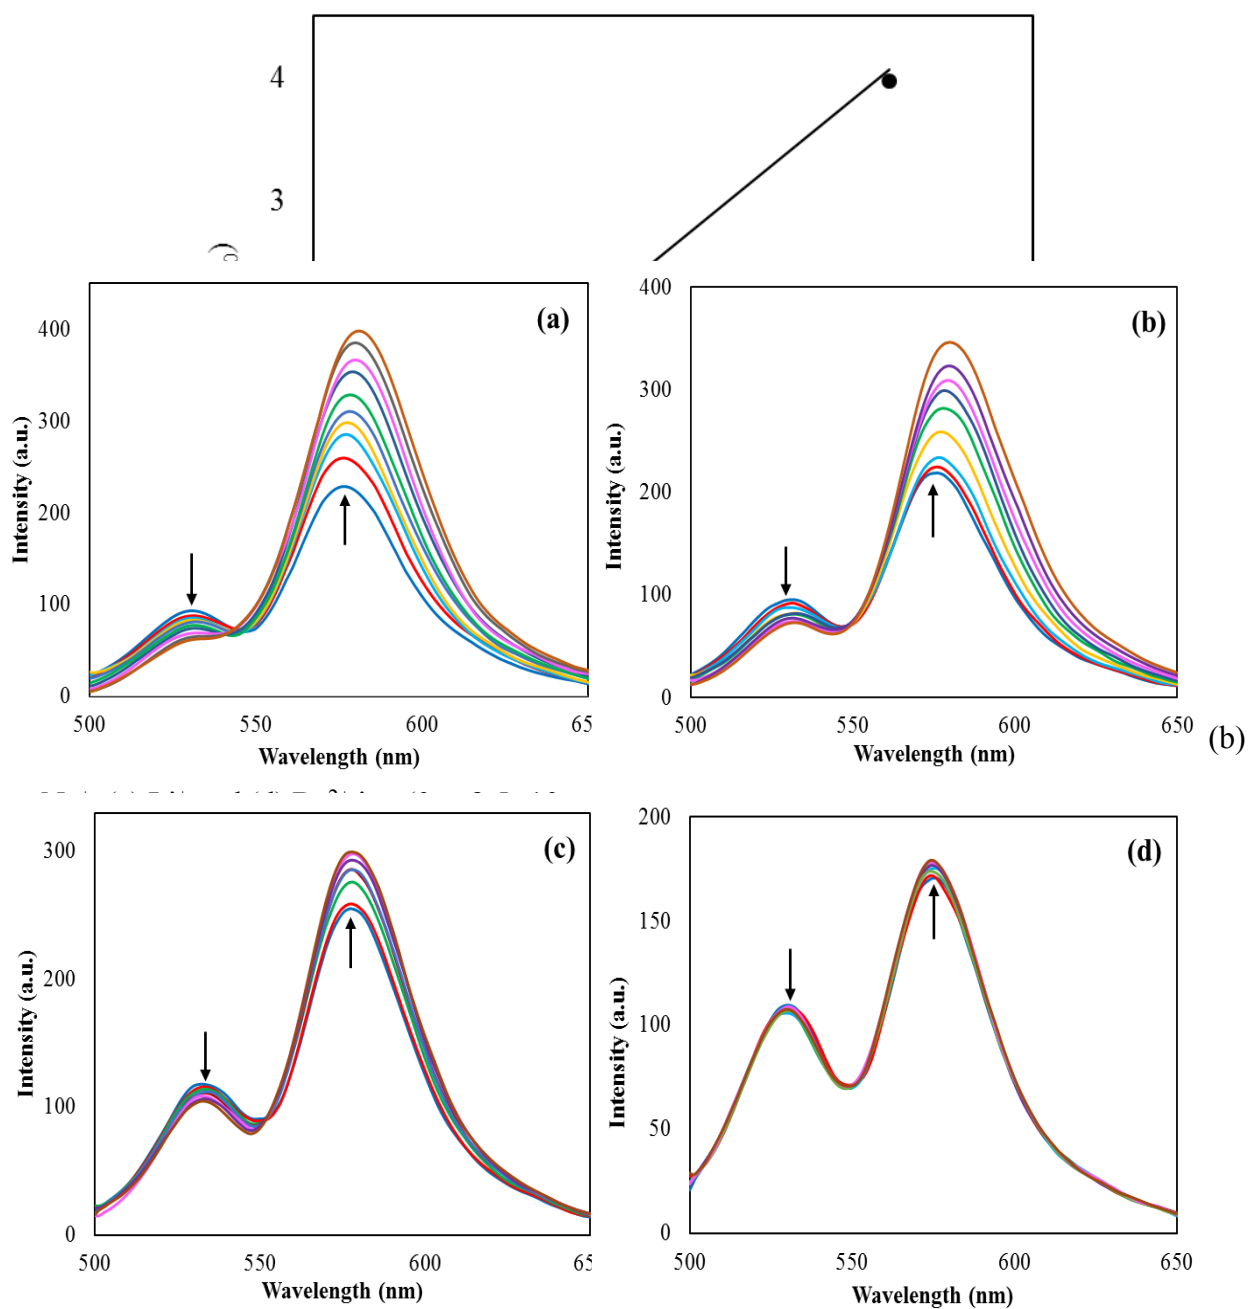

**Fig. S8** Benesi-Hildebrand plot of  $1/F-F_0$  versus  $1/[K^+]$  for the QDCE-RBCE conjugate.

$F_0$  and  $F$  are the fluorescence intensity ratio changes  $F_{575}/F_{530}$  in the absence and presence different concentration of  $K^+$  ion.
